# Supplementary material for: Interception of Signaling Circuits of Esophageal Adenocarcinoma Cells by Resveratrol Reveals Molecular and Immunomodulatory Signatures
Source: MDPI journal article supplement (doi:10.3390/cancers13225811), 2021-11-19
Supplement: s1 [file s1]

FLO-1

Control

Resveratrol

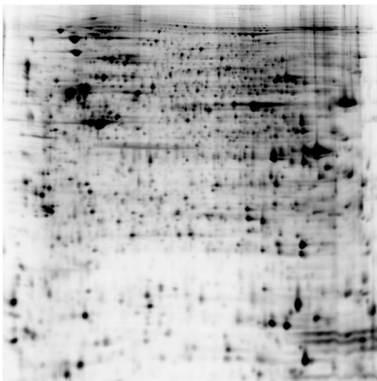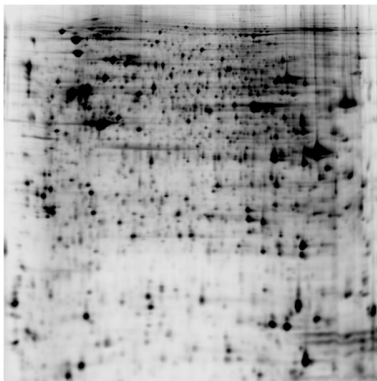

Overlay

FLO1 Control  
/ FLO1 Res

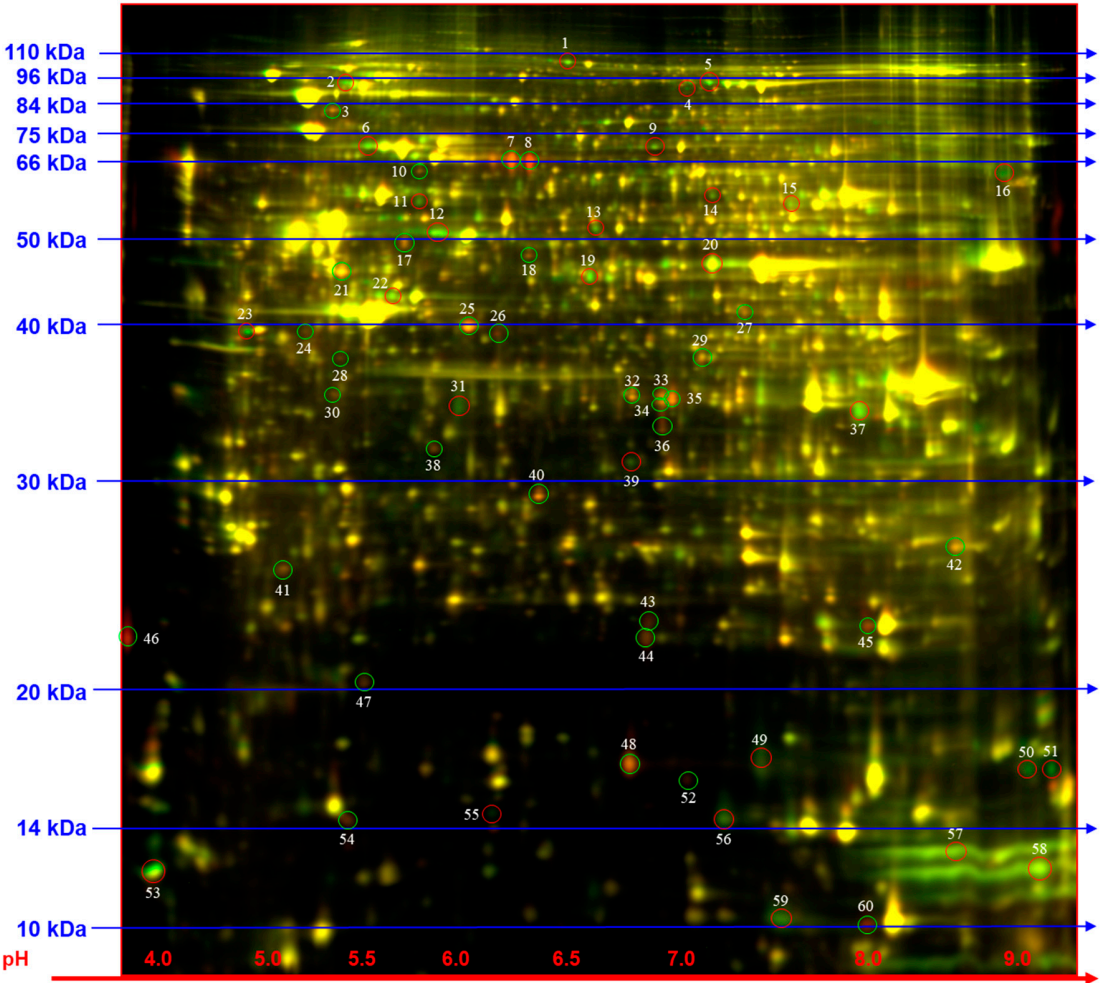

OE-19

Control

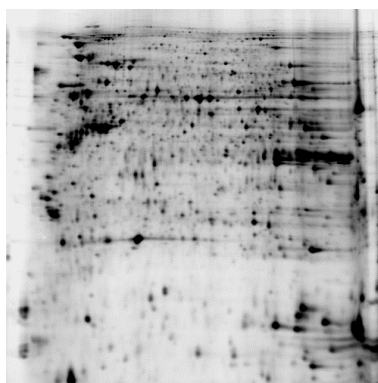

Resveratrol

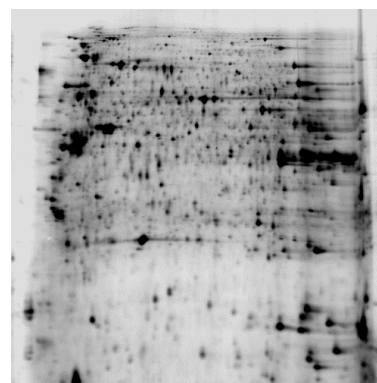

Overlay

OE19 Control

/ OE19 Res

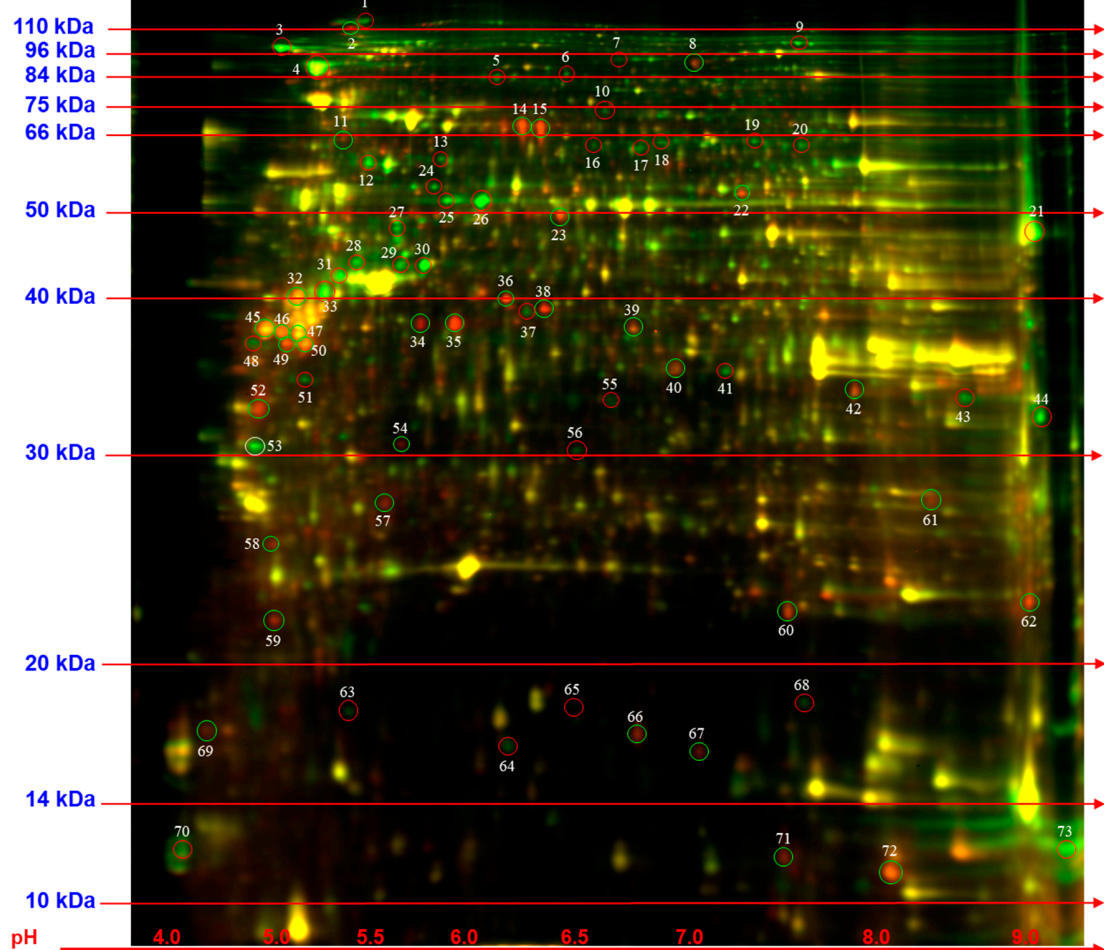

**Figure S1. Proteomic Analysis of OE19 and FLO-1 cells on treatment with resveratrol at the IC<sub>50</sub> concentration of 50  $\mu$ M and 40  $\mu$ M, respectively.** Differentially expressed proteins are circled. Detailed procedures are described in Materials and Methods.
